## CORRECTION

# Correction: Wash exhibits context-dependent phenotypes and, along with the WASH regulatory complex, regulates *Drosophila* oogenesis (doi:10.1242/211573)

Jeffrey M. Verboon, Jacob R. Decker, Mitsutoshi Nakamura and Susan M. Parkhurst

There was an error published in *J. Cell Sci.* (2018) **131**, jcs211573 (doi:10.1242/211573).

The images in Fig. 5A,A' incorrectly presented results from *CDCDC53<sup>RNAi(2)</sup>*, and not *CDCDC53<sup>RNAi(1)</sup>*, as indicated in the label and legend. The correct panels are as shown below:

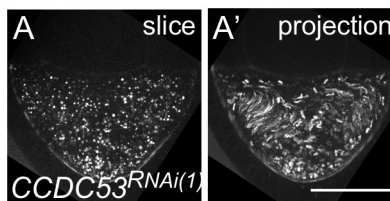

**Fig. 5. SHRC knockdowns exhibit premature ooplasmic streaming and actin defects.** Single time-point and 30 time-point projections of live time-lapse movies of stage 7 oocytes in *CCDC53<sup>RNAi(1)</sup>* (A,A').

The authors apologise to the readers for any confusion that this error might have caused.
